# Supplementary material
Source: MDPI journal article supplement (https://www.mdpi.com/2311-7524/6/1/14)
Supplement: s1 [file s1]

# Supplementary Materials: Quantitative Trait Loci (QTL) Analysis of Fruit and Agronomic Traits of Tropical Pumpkin (*Cucurbita moschata*) in an Organic Production System

Angel R. Del Valle Echevarria <sup>1</sup>, Alexandra Campbell <sup>1</sup>, Theodore J. K. Radovich <sup>1</sup>, Tia Silvasy <sup>1</sup>, Sarah Moore <sup>2</sup>, Michael B. Kantar <sup>1,\*</sup>

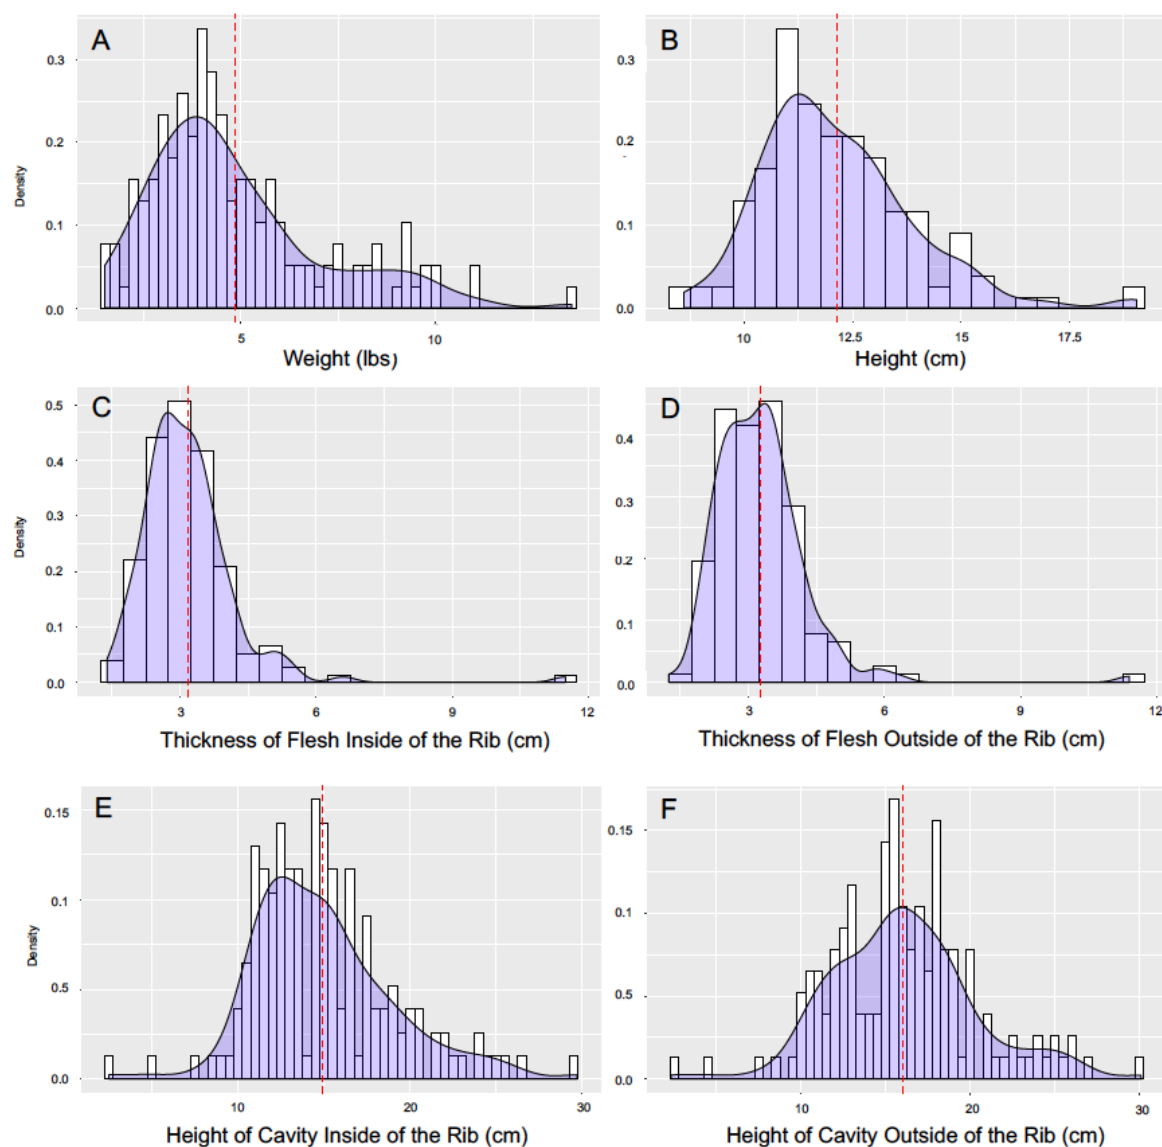

**Figure S1.** Phenotypic distribution of traits evaluated by the Harley-Knott (hk) regression method in R/qtl.

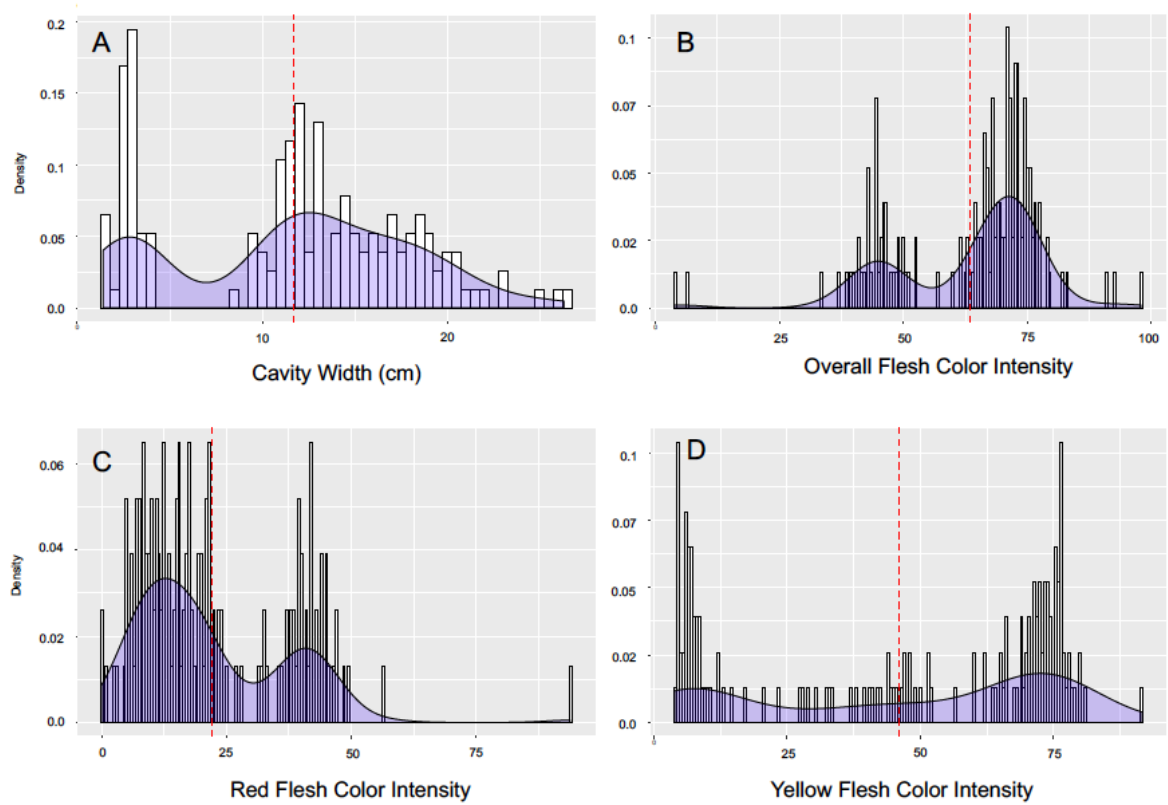

**Figure S2.** Phenotypic distribution of traits evaluated by 2-part, also known as bimodal, method in R/qtl.

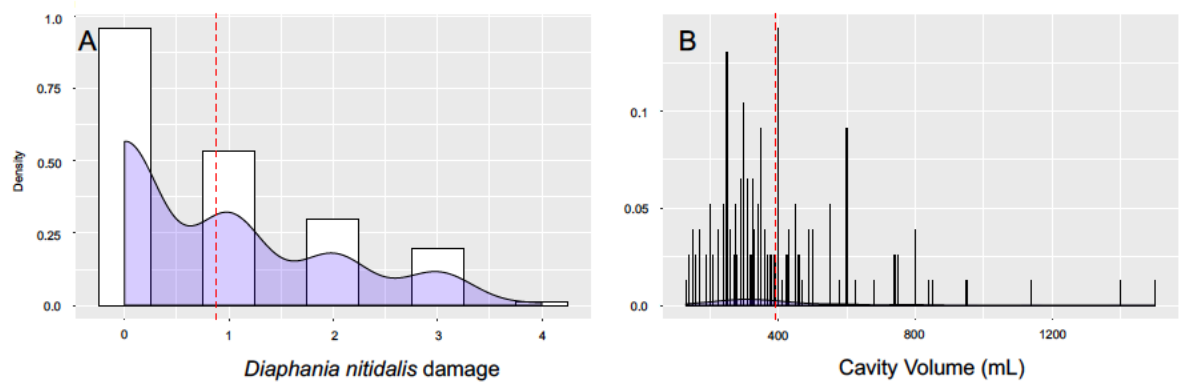

**Figure S3.** Phenotypic distribution of traits evaluated by non-parametric method in R/qtl.

**Table S1.** Sequence analysis between significant reads in this study and the pumpkin genome.

| Marker | Linkage | Traits     | Direction of | Percent    | Donor  | Coordinates in | Annotation (if any) |
|--------|---------|------------|--------------|------------|--------|----------------|---------------------|
|        | Group   | Associated | QTL          | Phenotypic | Parent | Genome         |                     |
|        | (cM)    |            |              | Variance   |        |                |                     |
|        |         |            |              | explained  |        |                |                     |

|                |           |                                                                                 |                                | (R-squared) |                 |                      |                  |
|----------------|-----------|---------------------------------------------------------------------------------|--------------------------------|-------------|-----------------|----------------------|------------------|
| Pumpkin_282381 | 1 (195.1) | Flesh color<br>intensity                                                        | Decrease in<br>color intensity | 6.8%        | Taina<br>Dorada | 15:706796..706659    | CmoCh05G001640.1 |
| Pumpkin_93626  | 1 (194.1) | Insect<br>damage<br>and red<br>color<br>intensity                               | Reduction in<br>insect damage  | 18.00%      | Shima           | 1:4070770..4070940   | CmoCh01G007800.1 |
| Pumpkin_89537* | 1 (21.4)  | Cavity<br>width                                                                 | Increase in<br>Cavity width    | 16.47%      | Taina<br>Dorada | 0:20002042..20002198 | -                |
| Pumpkin_164349 | 9 (176.3) | Insect<br>damage,<br>flesh color<br>intensity,<br>and red<br>color<br>intensity | Reduction in<br>insect damage  | 10.21%      | Shima           | 15:708652..708809    | CmoCh15G001520.1 |
| Pumpkin_46427  | 12 (49.8) | flesh color<br>intensity<br>and red                                             | Increase in<br>color intensity | 16.47%      | Taina<br>Dorada | 13:8090313..8090145  | CmoCh13G009130.1 |

|                 |            |                                                            |                               |        |                 |                       |                  |
|-----------------|------------|------------------------------------------------------------|-------------------------------|--------|-----------------|-----------------------|------------------|
|                 |            | color<br>intensity.                                        |                               |        |                 |                       |                  |
| Pumpkin_216447* | 15 (135.0) | Insect<br>damage                                           | Increase in<br>susceptibility | 10.41% | Taina<br>Dorada | 18:6668762..6668914   | -                |
| Pumpkin_210956  | 15 (118.5) | Red color<br>intensity                                     | Increase in<br>intensity      | 4.11%  | Taina<br>Dorada | 15:3689527..3689600   | CmoCh15G007520.1 |
| Pumpkin_221779  | 17 (73.8)  | Flesh color<br>intensity<br>and red<br>color<br>intensity. | Increase in<br>intensity      | 7.57%  | Taina<br>Dorada | 5:10556898...10556795 | CmoCh05G013660.1 |

\*The highest homology shown but it has multiple hits.

**Table S2.** Genomic comparison between *C. moshata* gene models and *Cucumis melo* genome.

| <i>C. moshata</i> gene model | <i>C. melo</i> locus | Comment*                                                  |
|------------------------------|----------------------|-----------------------------------------------------------|
| CmoCh05G001640.1             | MELO3C010837         | Mannose-P-dolichol utilization defect 1 protein.          |
| CmoCh01G007800.1             | MELO3C001921         | Kinase, putative                                          |
| CmoCh15G001520.1             | MELO3C008306         | <i>CLATHRIN HEAVY CHAIN</i> .                             |
| CmoCh13G009130.1             | MELO3C002271         | Protein ApaG                                              |
| CmoCh15G007520.1             | MELO3C022819         | F-box and Leucine Rich Repeat domains containing protein, |

|                  |              |                                           |
|------------------|--------------|-------------------------------------------|
|                  |              | putative isoform 1                        |
| CmoCh05G013660.1 | MELO3C004578 | Alpha/beta-Hydrolases superfamily protein |

\*Taken from cucurbitsgenomics.org (Zhen et al., 2018).
